1 **The *Drosophila* fertility factor *kl-3* is linked to the Y-**  
2 **chromosome of the vector of Chagas' disease**  
3 ***Triatoma infestans* (Hemiptera: Reduviidae) and is**  
4 **essential for male fertility.**

5  
6 Carlos H. Martins<sup>1</sup>; Rodrigo S. V. P da Silva<sup>1</sup>; Thalia K. Ferreira<sup>1</sup>; Rafaela  
7 Paim<sup>1</sup>; Grasielle C. D. Pessoa<sup>1</sup>; Mauricio V. Sant'Anna<sup>1</sup>; Nelder F.  
8 Gontijo<sup>1</sup>; Ricardo N. Araujo<sup>1</sup>; Marcos H. Pereira<sup>1</sup>; A. Bernardo Carvalho<sup>2</sup>;  
9 Leonardo B. Koerich<sup>1\*</sup>

10 <sup>1</sup>Departamento de Parasitologia – ICB-UFMG/Brazil

11 <sup>2</sup>Departamento de Genética – IB-UFRJ/Brazil

12 \*To whom correspondence should be addressed: lbkoerich@ufmg.br

13  
14 **Abstract**

15 In many insects, the Y chromosome plays a key role in sexual determination and male  
16 fertility. The Chagas disease vector *Triatoma infestans* has 22 autosomal chromosomes  
17 and a pair of XY sex chromosomes. However, the knowledge on the Y chromosome of  
18 this species, its genetic content or its biological function, is very poor. Due to repetitive  
19 DNA, Y chromosome sequences are poorly assembled in genome projects, hindering  
20 structural and functional studies on Y-linked genes. Our group has developed many of  
21 the bioinformatic tools to identify Y-linked sequences in assembled genomes. Here, we  
22 describe the identification of a  $\gamma$ -dynein heavy chain linked to the Y-chromosome of *T.*  
23 *infestans*. This protein is orthologous to the *Drosophila melanogaster* Y-linked gene *kl-*  
24 *3*. In *D. melanogaster*, dyneins of the Y chromosome are known as male fertility factors  
25 and their deletion causes male infertility. We performed knockdown of the *kl-3*  
26 expression to ascertain its function in *T. infestans*. Our results showed that injection of  
27 dsKL3 reduced, significantly, the fertility of *T. infestans* males ( $p < 0.01$ ). The mean  
28 number of eggs laid by the control group was 35.64 eggs/couple while the *kl-3*  
29 knockdown group was of 11.82 eggs/couple (five couples did not lay any eggs).

30 Differences in eclosion rate was even more significant, with a hatching mean rate of  
31  $16.85 \pm 10.03$  and  $1.69 \pm 3.58$  ( $p < 0.001$ ) for the control and the silenced groups  
32 respectively. Our results suggest that *kl-3* maintains its functional role as essential for  
33 male fertility in *T. infestans*. Hence, it seems that the Y-chromosome of *T. infestans* has  
34 a key role in male fertility. This is the first report of a *kl-3* orthologue linked to the Y  
35 chromosome of an insect species outside the diptera clade. In addition to the first report  
36 of a Y-linked gene in *T. infestans* with a role for male fertility, this finding is of great  
37 relevance for the study of the evolution of Y chromosomes and further studies that  
38 could lead to novel approaches in insect control.

## 39 **Introduction**

40 In 1916 Calvin Bridges published his seminal paper in which he proved Morgan's  
41 theory of Chromosomal Herdability<sup>1</sup>. In this same work Bridges also showed that the Y  
42 chromosome of *Drosophila melanogaster* did not determined male sex but was essential  
43 for male fertility. It was only in 1960 that Brosseau<sup>2</sup> performed a series of deletion  
44 experiments showing that the *D. melanogaster* Y-chromosome contained seven fertility  
45 factors (later reduced to six fertility factors<sup>3</sup>), which were named as *kl-1*, *kl-2*, *kl-3*, *kl-5*,  
46 *ks-1* and *ks-2*. It took more than thirty years to find out that *kl-5* contained the coding  
47 sequence of a dynein proteins, which is responsible for the motility of flagella<sup>4</sup>. With  
48 the release of the *D. melanogaster* genome in 2000<sup>5</sup>, Carvalho and collaborators  
49 developed new strategies to identify Y-linked sequences, describing six new Y-linked  
50 genes and showing that fertility factors *kl-2* and *kl-3* harboured other dynein proteins (a  
51 x-dynein and a  $\gamma$ -dynein, respectively)<sup>6,7</sup>. Still, even in the genomic era, the study on Y-  
52 chromosome evolution and function has lagged behind. The Y chromosome is  
53 heterochromatic in most species, which makes it difficult to identify Y-linked sequences  
54 in many genome studies<sup>8,9</sup>. Even now, with accessible sequencing technologies, the  
55 most studied Y chromosomes are those of mammals (specially humans, chimpanzees  
56 and mice) and *Drosophila*<sup>6,7,10-17</sup>. Recent studies proposed new approaches to use the  
57 power of new genome sequencing technologies (NGS) to boost the identification of Y-  
58 linked sequences in new genomes. In the first study, Hall and collaborators<sup>18</sup> performed  
59 Illumina DNA sequencing of males and females of *Anopheles* mosquitoes, and were  
60 able to identify six new Y-linked genes in these insects. This method was also used to  
61 describe the male sex determination gene in *Aedes aegypti*<sup>19</sup>. In the second study,  
62 Carvalho and Clark<sup>20</sup> used sequences from female DNA to find specific male sequences

63 in the assembled *Drosophila virilis* and human genomes. They were able to identify  
64 four new Y-linked genes in *D. virilis* and 300 kb of previously unidentified sequences  
65 on the human Y chromosome. Insects have a variety of sex chromosome systems,  
66 ranging from total absence of sex chromosomes to X0, X<sup>n</sup>Y, ZW and traditional XY.  
67 Therefore, the study of genomes of non-model insects, such as insects' vectors of  
68 disease, could provide valuable data to understand sex-chromosome evolution and  
69 promote the expansion on the knowledge of insect biology.

70 Chagas disease is one of the most important parasitic infection in Latin America and  
71 more than 12 million people are infected by *Trypanosoma cruzi* (the protozoan agent of  
72 Chagas' disease)<sup>21</sup>. *Triatoma infestans* is the most important vector species in the  
73 southern cone area of South America and with the effort of the Southern Cone Initiative  
74 (which had the main goal of interrupting the *T. cruzi* transmission using chemical  
75 insecticides to eliminate *T. infestans* populations)<sup>22</sup> its populations were highly reduced.  
76 However, *T. infestans* persists as domestic and sylvatic populations in several areas of  
77 the Gran Chaco region from Argentina, Bolivia and Paraguay and parts of the highland  
78 valleys of Bolivia<sup>23</sup> and studies suggests that high genetic polymorphism could be  
79 correlated to *T. infestans* resistance. Despite their medical importance, the research on  
80 triatomine genetics is almost non-existent and only the genome of *Rhodnius prolixus* is  
81 available so far. Cytogenetical studies suggests that Andean and non-Andean  
82 populations of *T. infestans* have a significant difference in genome size (1.8Gbp and  
83 1.1Gbp respectively), despite a constant number of diploid chromosomes (10A + XY),  
84 which suggests a high variability in heterochromatin<sup>24,25</sup>.

85 In 2016 we described nine new Y-linked genes in *R. prolixus*<sup>26</sup>. At that time, we could  
86 only speculate on triatomine Y-chromosome role and on the origin of these  
87 chromosomes. More than that, we pointed out the need of new triatomine genomes for  
88 further evolutionary studies. Here we describe a thorough analysis of the *T. infestans* Y-  
89 chromosome. Differently from the *R. prolixus* Y-chromosome (in which we were not  
90 able to find single copy genes), the *T. infestans* Y-chromosome harbors a single copy  $\gamma$ -  
91 dynein protein and we provide evidence that, as in *D. melanogaster*, this protein is  
92 essential for *T. infestans* male fertility.

93

94

## 95 **Results and Discussion**

96 Chagas disease is one of the most important parasitic infection in Latin America and  
97 more than 12 million people are infected by *Trypanosoma cruzi* (the protozoan agent of  
98 Chagas' disease)<sup>21</sup>. Despite its relevance as vector of Chagas' disease, triatomine  
99 genetics has been neglected for many years. The recent sequencing of *R. prolixus* and  
100 the effort to sequence *T. infestans* (unpublished) has facilitated some genetic studies,  
101 mainly in functional genomics using RNAi<sup>27,28</sup>. Still, a lot is missing in our knowledge  
102 of gene function, chromosome organization and evolution. Y-chromosomes are  
103 involved in major biological phenomena such as sex determination and male fertility.  
104 They remain largely uncharacterized because of their high repeat content which  
105 precludes sequence assembly into large and easily studied contigs. Using the approach  
106 proposed by Carvalho and Clark (called YGS) we identified many Y-linked sequences  
107 and found a single copy  $\gamma$ -dynein that is orthologous to the *D. melanogaster kl-3*.

108

### 109 **Identification of Y-linked genes in *Triatoma infestans*.**

110 *Triatoma infestans* genome was assembled into 4,865 scaffolds that cover 1.1Gb (~90%  
111 of the genome). The number scaffolds that cover 50% of the genome (N50) is 224, the  
112 N50 scaffold size is 1.1Mb. The YGS program<sup>20</sup> determines the percentage of *k-mers*  
113 per scaffold that are unique to the male genome. Figure 1 (panel A) shows the  
114 distribution of scaffolds by size (number of valid *k-mers*) per percentage of unique male  
115 sequences. In our initial analysis, the autosomal or X sequences are shifted to the right  
116 of the graph (close to the 5% point of single male sequences), while there is no 100%  
117 male sequence. Carvalho *et al.*<sup>20</sup> pointed out that such results suggest, respectively, low  
118 coverage of female DNA sequencing and slight contamination of male DNA in female  
119 DNA samples. As suggested by Carvalho and cols.<sup>20</sup> we considered all scaffolds with  
120 more than 30% as putative Y-linked sequences. This cut-off returned 334 scaffolds  
121 (~5.8Mbp of sequences) as candidates for Y-linkage. Nearly 30% of the sequences  
122 (1.98Mbp) were constituted of gaps, and initial filtering eliminated 217kbp of satellite  
123 DNA and 8.4kbp of ribosomal DNA (rDNA). From the remaining sequences, initial  
124 blast searches identified 3,146 possible coding sequences, from which 2,637 (83.8%)  
125 were identified as transposable elements. We selected 12 scaffolds containing putative  
126 coding sequences to test linkage to Y as proof that the proposed method works (Figure  
127 1, panel B).

128

129

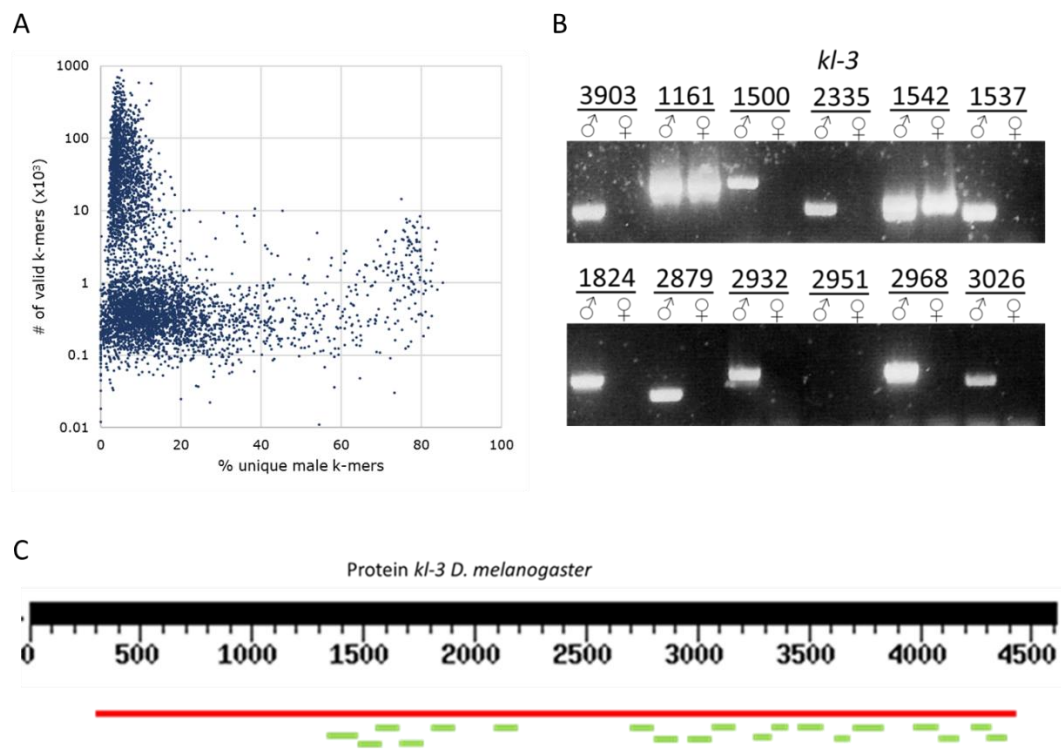

130

131 **Figure 1. Identification of Y-linked sequences of *Triatoma infestans* and *kl-3***  
132 **annotation. A)** *T. infestans* scaffolds (blue dots) were evaluated according to the  
133 number of single-stranded sequences (*k-mers*) that lack homology to female sequences  
134 (% unique male sequences). For a preliminary analysis, we consider scaffolds with  
135 more than 75% unique sequences as Y-linked candidates. **B)** Linkage assay was  
136 performed by PCR for male and female DNA. The presence of amplification in male  
137 with absence of amplification for female samples indicates linkage to the Y  
138 chromosome. Sequence 2335 contains an exon of the *kl-3* gene. **C)** tBLASTn search  
139 using the *D. melanogaster kl-3* gene as a template suggests the existence of two  $\gamma$ -  
140 dynein genes in *T. infestans*. One of the genes is found in scaffold 603 (red bar) which  
141 possesses only 4% of unique male sequences, suggesting linkage to an autosomal  
142 chromosome or to the X chromosome. The second copy is dispersed in several  
143 candidate Y chromosome scaffolds (green bars).

144 The remaining 509 putative coding sequences were grouped into 390 clusters. Virtually  
145 all clusters found were composed of multicopy genes (those clusters contained the  
146 following *R. prolixus* Y-linked genes: *met-Y*, *znf-Y1*, *znf-Y2*; *rpr-Y2* and *rpr-Y3*), while

147 only three clusters were composed of single copy genes. From those, two showed  
148 similarities with RNA-polymerases while a third cluster (composed of 19 sequences)  
149 showed high similarities with  $\gamma$ -dynein heavy chain proteins. It is important to make a  
150 few considerations here. Many studies using genomics to identify Y-linked genes have  
151 shown the difficulties on studying heterochromatic regions<sup>6,7,18–20,29</sup>. Genome  
152 assemblers based on short read sequences are not capable to assemble repetitive regions,  
153 such as satellite rDNA. Hence, in most genome projects, Y-linked scaffolds are usually  
154 composed of short contigs or are packed with gaps (in our case, gaps enclose nearly  
155 30% of the scaffold sequences)<sup>6</sup>. Also, heterochromatic sequences are well known for  
156 its richness in transposable elements (TEs), which creates an environment that facilitates  
157 the increase in copies of heterochromatic genes<sup>8,30,31</sup>. Here we found that from 3,146  
158 putative coding sequences, 2,637 are of TEs and at least 487 are multicopy genes. A  
159 total of 22 coding sequences proved to be unique (single copy) and 19 of them showed  
160 similarities with a single  $\gamma$ -dynein protein. Carvalho and cols. were the first to point out  
161 that, due to the nature of Y genome assembly, Y-linked genes are usually scattered, and  
162 incomplete, in assembled genomes, creating a signature of Y-linked genes<sup>6</sup>. Figure 1  
163 (panel C) shows the alignment of these 19 sequences (green bars) with the *D.*  
164 *melanogaster*  $\gamma$ -dynein *kl-3* (Figure 1, panel C) in which the scattered pattern expected  
165 for Y-linked genes is clear. The same figure also shows a great number of gaps in the Y-  
166 linked gene, and an autosomal paralog in scaffold 603 (red bar) that has only 4% of  
167 unique male *k-mers*. We are working in filling all the gaps by standard Sanger  
168 sequencing; however, this process is laborious and remains unfinished.

169

### 170 **The Y-linked $\gamma$ -Dynein of *Triatoma infestans* is orthologous to the fertility factor *kl-*** 171 ***3* of *Drosophila melanogaster***

172 Although BLAST results suggested that the Y-linked  $\gamma$ -dynein was similar the *D.*  
173 *melanogaster* fertility factor *kl-3*, it was only with an evolutionary study that we could  
174 ascertain this relationship. Indeed, using the *D. melanogaster kl-3* paralogous gene to  
175 ascertain ortholog status, phylogeny strongly suggests that the Y-linked  $\gamma$ -dynein is  
176 orthologous to *kl-3* (Figure 2). *Kl-3* is not exclusive of *D. melanogaster* and *T. infestans*  
177 and can be found in many insect species. However, in most species with sequenced  
178 genomes, *kl-3* is an autosomal gene. In fact, we do not have empirical evidence for *kl-3*  
179 linkage in every species. However, the fact that in all these species (besides *Drosophila*



180 and *T. infestans*) *kl-3*, a ~15kbp gene, is easily found complete in large scaffolds, is  
 181 strong evidence for autosomal linkage. Interestingly, we could not find (even in the read  
 182 archives) the *kl-3* in *R. prolixus* (although we have found its paralogous gene CG9492).  
 183 This brings the question on when *kl-3* was lost in *R. prolixus* and answering this  
 184 question may bring interesting data on triatomine Y chromosome evolution. However,  
 185 to answer such question, new genomes on the Rhodini and Triatomini tribes are  
 186 necessary.

187

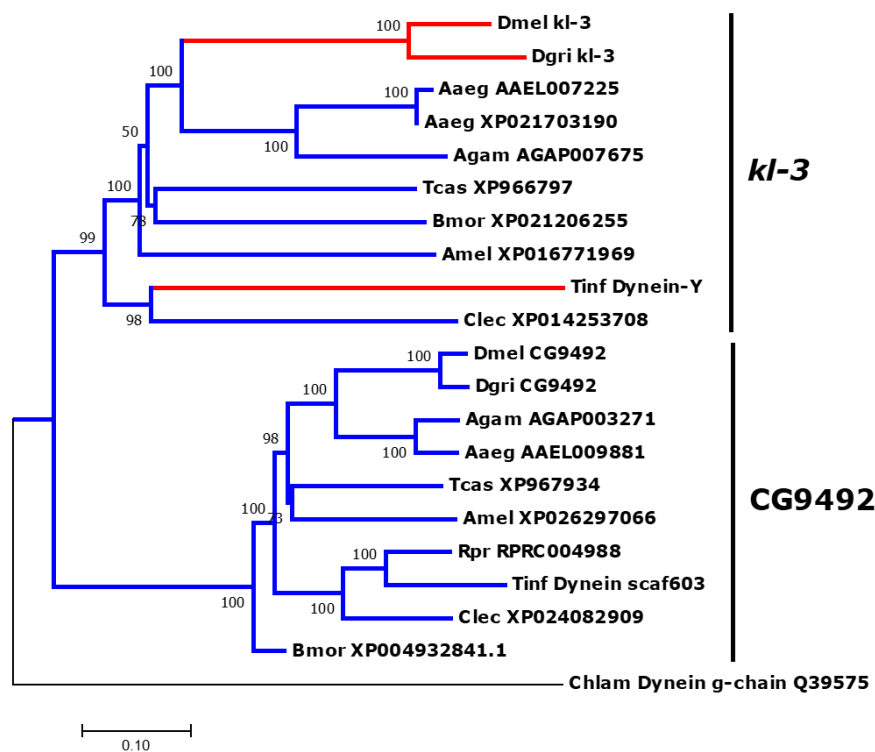

188

189 **Figure 2. Evolutionary analysis of *Triatoma infestans kl-3*.** The evolutionary history  
 190 of the *kl-3* and its paralogous gene CG9492 was inferred using the Neighbor-Joining  
 191 method. Red lines show lineages in which *kl-3* is linked to the Y-chromosome. Blue lines  
 192 show lineages in which the referred gene is putatively autosomal. Sequence accession  
 193 numbers are shown in each branch after species abbreviation. Species abbreviations are:  
 194 Dmel = *Drosophila melanogaster*; Dgri = *D. grimshawii*; Aaeg = *Aedes aegypti*;  
 195 Agam = *Anopheles gambiae*; Tcas = *Tribolium castaneum*; Bmor = *Bombyx mori*; Amel  
 196 = *Apis mellifera*; Rpr = *Rhodnius prolixus*; Tinf = *Triatoma infestans*; Clec = *Cimex*  
 197 *lectularius*. Evolutionary analyses were conducted in MEGA.

198

## 199 **Silencing the expression of *Triatoma infestans* *kl-3* causes male sterility**

200 After the ascertain of the Y-linked  $\gamma$ -dynein status as orthologous to *kl-3*, we questioned  
201 ourselves if this gene was essential for male fertility. We first quantified the *kl-3* mRNA  
202 expression during the insect development (Figure 3, panel A). We observed that *kl-3*  
203 mRNA starts to be expressed in very low levels in 4<sup>th</sup> instars. The expression levels  
204 increase significantly in 5<sup>th</sup> instar males (when testis development is observable) and  
205 maintain similar levels in adult males, with specific expression in testis. Interference  
206 RNA has been successfully applied to triatomine functional genomics for more than ten  
207 years<sup>28,32</sup>, and recent studies suggests that gene knockdown are epigenetically heritable  
208 in *R. prolixus*<sup>27</sup>. To understand if *T. infestans kl-3* is essential for male fertility, we  
209 injected 5<sup>th</sup> instar males with 300ng of double stranded RNA targeting the *kl-3* mRNA  
210 (dsKL3). After moulting, dsKL3 treated animals were used to form couples with virgin  
211 females, and egg laying was accompanied for five weeks. Our results show that *kl-3*  
212 knockdown reduced the mean oviposition from  $35.64 \pm 21.22$  to less than  $11.82 \pm 17.55$   
213 eggs laid per couple (Figure 1, panel B). While the control group presents a normal  
214 distribution of oviposition, the treated group presented a clear abnormal distribution  
215 (with many females not laying any eggs). Kolmogorov-Smirnov tests showed that the 3-  
216 fold reduction in oviposition is statistically significant ( $p < 0.01$ ). When the number of  
217 individuals in the progeny was evaluated, the differences were even more significant  
218 ( $p < 0.001$ ), with a reduction in the number of offspring (Figure 1, panel C) from  
219  $16.85 \pm 10.03$  (control group) to  $1.69 \pm 3.58$  (dsKL3 group).

220 In *D. melanogaster*, knockout of *kl-3* causes sperm immobility. Immediately, a question  
221 whether females were in fact inseminated and spermatozoa was immotile, was raised.  
222 Indeed, spermatheca visualization in optical microscope showed that all females, from  
223 both groups, were fertilized. However, there is no mention on the literature about sperm  
224 motion in triatomines, and there is no protocol for such observations. Hence, the  
225 evidences shown from now on are based on exploratory approaches and with no  
226 quantitative procedures. In our slide preparations, we could not find sperm motility in  
227 many samples from the control group. In those cases, were motility was observed, it  
228 took up to ten minutes to observe some activity. For the *kl-3* knockdown group, the  
229 number of slides were motility was observed was even lower, and it took up to 20  
230 minutes to observe any activity. However, we could not observe any correlation  
231 between egg laying and sperm motility in dsKL3 treated females. As stated before, our



232 methodology was purely based in intuition and we are now preparing better protocols  
 233 and searching for objective quantitative methods to better understand how *kl-3*  
 234 knockdown impairs sperm motility. Nonetheless, this is the first report of sperm  
 235 motility in triatomines. One important issue that remains to be answered is the reason  
 236 why dsKL3 treated females did not laid eggs, since in *R. prolixus* virgin females lay  
 237 eggs normally. There is nor report if *T. infestans* females lay eggs normally and we are  
 238 performing experiments to answer that question.

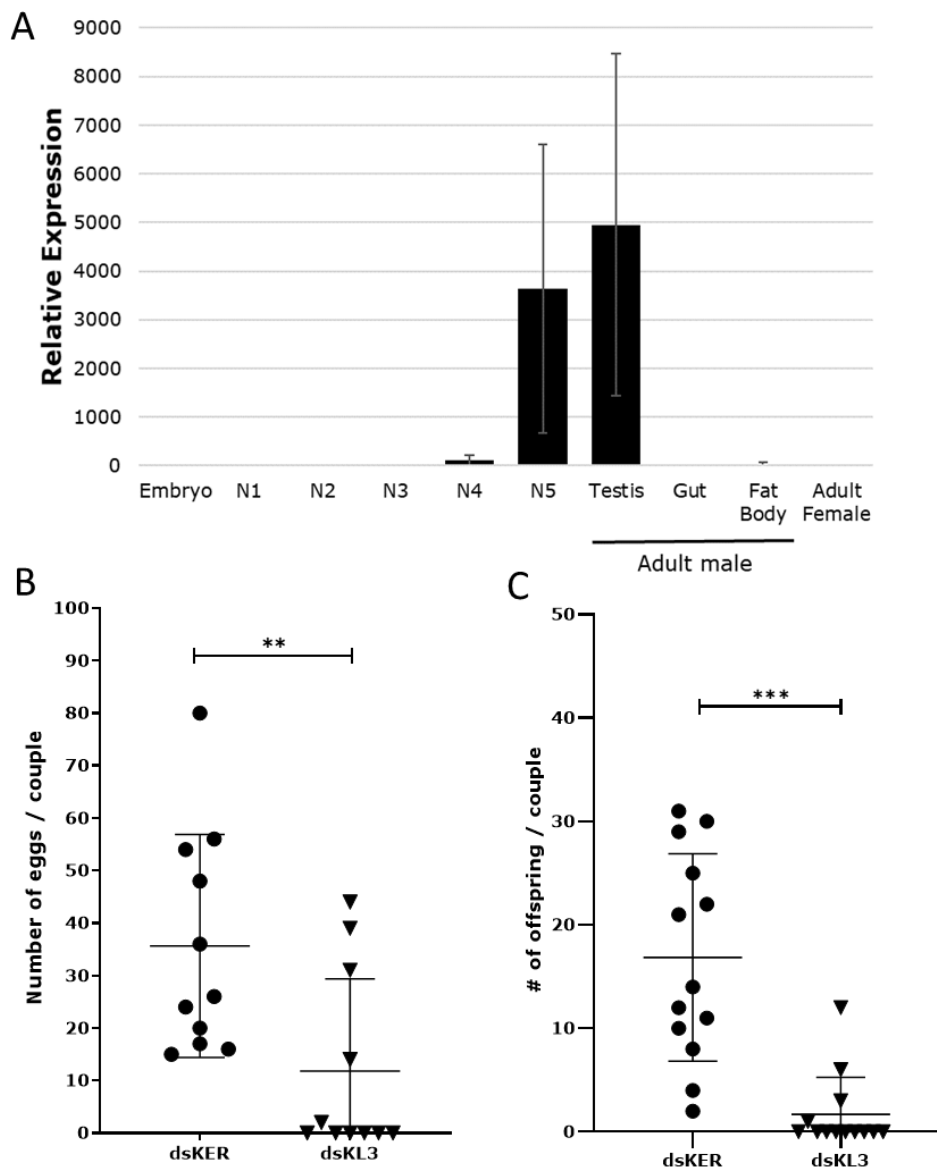

239

240 **Figure 3. Functional analysis of *Triatoma infestans kl-3*.** **A)** Expression pattern of *kl-*  
 241 *3* in different development stages and adult tissues of *T. infestans*. **B)** Number of eggs  
 242 laid per couple of *kl-3* knockdown (dsKL3) and control (dsKER) males. Fifth instar  
 243 males were injected with 1µg of dsRNA and couples were formed with virgin females

244 C) Number of offspring per couple of *kl-3* knockdown (dsKL3) and control (dsKER)  
245 males.

246

## 247 **Conclusions**

248 The elusive nature of Y-chromosomes hindered many studies on its genetics and  
249 evolution for decades. With the accessibility to genome sequencing, we are now living a  
250 gold era on Y-chromosome genomics, even in non-model species. Triatomine insects  
251 are vectors of one most important parasitic disease in Latin America, the Chagas'  
252 disease, and *Triatoma infestans* is the most triatomine relevant vector in the souther  
253 cone region of South America. Despite its relevance in public health, triatomine  
254 genetics has lagged behind. As a result, until now, we had no idea on the role of  
255 triatomine Y-chromosomes on sex determination and male fertility.

256 In our study we found the first Y-linked gene on the *Triatoma infestans* Y-chromosome.  
257 This Y-linked gene is a  $\gamma$ -dynein protein, orthologous to the Y-chromosome fertility  
258 factor *kl-3* of *Drosophila melanogaster*. This is the first time that *kl-3* is found linked to  
259 the Y-chromosome outside the Diptera clade. Through the use of gene silencing by  
260 interference RNA, we also provide that *kl-3* is essential for *T. infestans* male fertility.  
261 Thus, this is the first report providing evidence that *T. infestans* Y-chromosome has a  
262 role on male fertility. Our findings do not only provide new knowledge on triatomine  
263 biology, but also could offer some insights on triatomine Y-chromosome evolution.  
264 Moreover, we make available some valuable data on the scarce knowledge on  
265 triatomine male biology. Further triatomine genomes could provide even more  
266 information on the origin and evolution of triatomine Y-chromosome, ascertain if this  
267 chromosome is essential for sex-determination and provide new tools for biology and  
268 vector control studies.

## 269 **Acknowledgments**

270 This research is part of the Brazilian research program Institutos Nacionais de Ciência e  
271 Tecnologia – Entomologia Molecular.

272

## 273 **Author contributions**

274 We declare that this work was done by the authors named in this article and all  
275 liabilities pertaining to claims relating to the content of this article will be borne by the  
276 authors. All authors wrote, reviewed and approved the manuscript including figures and  
277 tables. L.B.K. conceived the study. R.S.V.P.S., L.B.K and A.B.C identified Y-linked  
278 sequences and performed the gene annotation process. R.S.V.P.S. performed Y-linkage  
279 confirmation tests, C.H.M. and R.S.V.P.S. performed the expression analysis. C.H.M.,  
280 T.K.F and R.P. performed functional experiments. C.H.M., R.N.A., M.R.V.S., N.F.G.,  
281 M.H.P., G.D.P. and L.B.K evaluated and discussed the results. L.B.K. edited the  
282 manuscript.

## 283 **Additional information**

284 **Competing interests:** The authors declare no competing interests.

285 **Data availability:** All sequences and annotation tables will be freely available in the  
286 GenBank as soon as the manuscript describing the *T. infestans* genome is published.  
287

## 288 **References**

289

- 290 1. Bridges, C. B. Non-disjunction as proof of the chromosome theory of heredity.  
291 *Genetics* **1**, 1–49 (1916).
- 292 2. Brosseau, G. E. Genetic Analysis of the Male Fertility Factors on the Y  
293 Chromosome of *Drosophila Melanogaster*. *Genetics* **45**, 257–74 (1960).
- 294 3. Kennison, J. A. The Genetic and Cytological Organization of the Y Chromosome  
295 of *Drosophila melanogaster*. *Genetics* **98**, 529–48 (1981).
- 296 4. Hackstein, J. H. P. & Hochstenbach, R. The elusive fertility genes of *Drosophila*:  
297 the ultimate haven for selfish genetic elements. *Trends Genet.* **11**, 195–200  
298 (1995).
- 299 5. Adams, M. D. *et al.* The genome sequence of *Drosophila melanogaster*. *Science*  
300 **287**, 2185–95 (2000).
- 301 6. Carvalho, A. B., Lazzaro, B. P. & Clark, A. G. Y chromosomal fertility factors

- 302 kl-2 and kl-3 of *Drosophila melanogaster* encode dynein heavy chain  
303 polypeptides. *Proc. Natl. Acad. Sci. U. S. A.* **97**, 13239–13244 (2000).
- 304 7. Carvalho, a B., Dobo, B. a, Vibranovski, M. D. & Clark, A. G. Identification of  
305 five new genes on the Y chromosome of *Drosophila melanogaster*. *Proc. Natl.*  
306 *Acad. Sci. U. S. A.* **98**, 13225–30 (2001).
- 307 8. Hoskins, R. *et al.* Heterochromatic sequences in a *Drosophila* whole-genome  
308 shotgun assembly. *Genome Biol.* **3**, 1–16 (2002).
- 309 9. Carvalho, A. B. Origin and evolution of the *Drosophila* Y chromosome. *Curr.*  
310 *Opin. Genet. Dev.* **12**, 664–668 (2002).
- 311 10. Perry, G. H., Tito, R. Y. & Verrelli, B. C. The evolutionary history of human and  
312 chimpanzee Y-chromosome gene loss. *Mol. Biol. Evol.* **24**, 853–859 (2007).
- 313 11. Goodfellow, P. N. & Lovell-Badge, R. SRY and sex determination in mammals.  
314 **27**, 71–92 (1993).
- 315 12. Article, R. & Ferguson-Smith, M. The Evolution of Sex Chromosomes and Sex  
316 Determination in Vertebrates and the Key Role of *DMRT1*. *Sex. Dev.* **1**, 2–11  
317 (2007).
- 318 13. Cortez, D. *et al.* Origins and functional evolution of Y chromosomes across  
319 mammals. *Nature* **508**, 488–93 (2014).
- 320 14. Carvalho, A. B. & Clark, A. G. Y chromosome of *D. pseudoobscura* is not  
321 homologous to the ancestral *Drosophila* Y. *Science* **307**, 108–110 (2005).
- 322 15. Bachtrog, D., Hom, E., Wong, K. M., Maside, X. & de Jong, P. Genomic  
323 degradation of a young Y chromosome in *Drosophila miranda*. *Genome Biol.* **9**,  
324 R30 (2008).
- 325 16. Bachtrog, D. Sex chromosome evolution: molecular aspects of Y-chromosome  
326 degeneration in *Drosophila*. 1393–1401 (2005). doi:10.1101/gr.3543605.
- 327 17. Bachtrog, D. Y-chromosome evolution : emerging insights into processes of Y-  
328 chromosome degeneration. *Nat. Rev. Genet.* **14**, 113–124 (2013).
- 329 18. Hall, A. B. *et al.* Six novel Y chromosome genes in *Anopheles* mosquitoes

- 330 discovered by independently sequencing males and females. *BMC Genomics* **14**,  
331 273 (2013).
- 332 19. Hall, A. B. *et al.* A male-determining factor in the mosquito *Aedes aegypti*.  
333 *Science* (80-. ). **348**, 1–7 (2015).
- 334 20. Carvalho, A. B. *et al.* Efficient identification of y chromosome sequences in the  
335 human and drosophila genomes. *Genome Res.* **23**, 1894–1907 (2013).
- 336 21. Stanaway, J. D. & Roth, G. The Burden of Chagas Disease. *Glob. Heart* **10**, 139–  
337 144 (2015).
- 338 22. Dias, J. C. P. Southern Cone Initiative for the elimination of domestic  
339 populations of *Triatoma infestans* and the interruption of transfusional Chagas  
340 disease. Historical aspects, present situation, and perspectives. *Mem. Inst.*  
341 *Oswaldo Cruz* **102 Suppl**, 11–8 (2007).
- 342 23. Bustamante Gomez, M., Gonçalves Diotaiuti, L. & Gorla, D. E. Distribution of  
343 Pyrethroid Resistant Populations of *Triatoma infestans* in the Southern Cone of  
344 South America. *PLoS Negl. Trop. Dis.* **10**, e0004561 (2016).
- 345 24. Panzera, F. *et al.* Evolutionary and dispersal history of *Triatoma infestans*, main  
346 vector of Chagas disease, by chromosomal markers. *Infect. Genet. Evol.* **27**, 105–  
347 113 (2014).
- 348 25. Panzera, F. *et al.* Cytogenetics and genome evolution in the subfamily  
349 Triatominae (Hemiptera, Reduviidae). *Cytogenet. Genome Res.* **128**, 77–87  
350 (2010).
- 351 26. Koerich, L. B. *et al.* First report of Y-linked genes in the kissing bug *Rhodnius*  
352 *prolixus*. *BMC Genomics* **17**, 100 (2016).
- 353 27. Paim, R. M. M., Araujo, R. N., Lehane, M. J., Gontijo, N. F. & Pereira, M. H.  
354 Long-term effects and parental RNAi in the blood feeder *Rhodnius prolixus*  
355 (Hemiptera; Reduviidae). *Insect Biochem. Mol. Biol.* **43**, 1015–20 (2013).
- 356 28. Araujo, R. N. *et al.* The role of salivary nitrophorins in the ingestion of blood by  
357 the triatomine bug *Rhodnius prolixus* {(Reduviidae:} Triatominae). *Insect*  
358 *Biochem. Mol. Biol.* **39**, 83–89 (2009).

- 359 29. Vibranovski, M. D., Koerich, L. B. & Carvalho, A. B. Two New Y-Linked Genes  
360 in *Drosophila melanogaster*. *Genetics* **179**, 2325–7 (2008).
- 361 30. Carvalho, A. B. *et al.* Y chromosome and other heterochromatic sequences of the  
362 *Drosophila melanogaster* genome: how far can we go? *Genetica* **117**, 227–237  
363 (2003).
- 364 31. Consortium, D. 12 G. *et al.* Evolution of genes and genomes on the *Drosophila*  
365 phylogeny. *Nature* **450**, 203–218 (2007).
- 366 32. Araujo, R. *et al.* {RNA} interference of the salivary gland nitrophorin 2 in the  
367 triatomine bug *Rhodnius prolixus* {(Hemiptera:} Reduviidae) by {dsRNA}  
368 ingestion or injection. *Insect Biochem. Mol. Biol.* **36**, 683–693 (2006).
- 369 33. Gnerre, S. *et al.* High-quality draft assemblies of mammalian genomes from  
370 massively parallel sequence data. *Proc. Natl. Acad. Sci.* **108**, 1513–1518 (2011).
- 371 34. Koerich, L. B., Wang, X., Clark, A. & Carvalho, A. B. Low conservation of gene  
372 content in the *Drosophila* Y chromosome. *Nature* **456**, 949–951 (2008).
- 373 35. Edgar, R. C. MUSCLE: Multiple sequence alignment with high accuracy and  
374 high throughput. *Nucleic Acids Res.* **32**, 1792–1797 (2004).
- 375 36. Kumar, S., Stecher, G. & Tamura, K. MEGA7: Molecular Evolutionary Genetics  
376 Analysis Version 7.0 for Bigger Datasets. *Mol. Biol. Evol.* **33**, 1870–1874 (2016).
- 377 37. Saitou, N. & Nei, M. The neighbor-joining method: a new method for  
378 reconstructing phylogenetic trees. *Mol. Biol. Evol.* **4**, 406–425 (1987).

379

## 380 **Material and Methods**

381

### 382 **Insects and genomic data**

383 Genomic lineage of *Triatoma infestans* was obtained from a colony maintained at  
384 FIOCRUZ-RJ from which insects were originally collected from the municipality of  
385 Mato Queimado, Rio Grande do Sul (Brazil). The manuscript describing the *T. infestans*  
386 genome sequencing strategy and annotation is under preparation. Briefly, genomic



387 DNA was purified from adult males and from 5<sup>th</sup> instar females and used to build male  
388 and female libraries. Each library was Illumina sequenced for a total depth of 50x and  
389 assembled with AllPathsLG<sup>33</sup> into ~4,000 scaffolds, covering 1.1Gbp (95%) of the  
390 genome. For molecular biology experiments, we used *T. infestans* maintained at our  
391 laboratory (Federal University of Minas Gerais) that was initiated with insects from  
392 populations of different regions of Brazil. All insects were maintained in a controlled  
393 room temperature (34°C) and humidity (60%), and feed in chickens every 14 days.

394

### 395 **Identification and annotation of Y-linked genes**

396 The identification of Y-linked candidates was performed following the YGS method<sup>20</sup>,  
397 using male reads to validate the results. All *T. infestans* scaffolds identified as Y  
398 chromosome candidates were softmasked for simple repetitive sequences using  
399 RepeatMasker software and the blast masking tool against a repetitive elements  
400 database (which included rDNA, transposable elements and multicopy genes, such as  
401 histones). Masked scaffolds were then blasted against different databases (Non-  
402 redundant Protein, Ref-Seq, SwissProt and *R. prolixus* proteins) in order to search for  
403 gene coding regions. A third Blast search against bacterial proteins was used to further  
404 filter our results (nucleotide or aminoacid identities above 95%). Alignments produced  
405 from at least one of the databases were considered as putative Y-linked genes. Putative  
406 genes were ordered according to the evidence, which were: 1) alignment with a  
407 conserved known gene from Ref-Seq or NR databases; 2) alignment with a conserved  
408 hypothetical gene from Ref-Seq database; 3) alignment with a *R. prolixus* annotated  
409 gene; and 4) alignment with a unconserved hypothetical gene from Ref-Seq or NR  
410 databases. Putative Y-linked genes were then blasted against the *T. infestans* genome to  
411 identify single-copy genes, recent duplications and multicopy genes. Y-linkage was  
412 confirmed by PCR as described elsewhere<sup>6,7,26,29,34</sup>. Confirmed Y-linked genes were  
413 then annotated with GeneWise to identify truncated genes and to define strategies for  
414 complete gene annotation. All Y-linked genes without described function were blasted  
415 against Protein Family of Domains database (PFam) and Eukariote Conserved  
416 Orthologous Database

417

## 418 **Molecular biology methods**

419 Males and virgin female *T. infestans* genomic DNA were isolated using DNeasy Blood  
420 & Tissue Kit (Qiagen, cat# 69504). PCR for the detection of Y-linkage was performed  
421 with GoTaq® Hot Start Polymerase (Promega, cat# M5005) and primers were designed  
422 to target exons (for gene Y-linkage tests) or elsewhere in the scaffold (for scaffold Y-  
423 linkage tests). RNA was isolated with TRIzol® Reagent (Invitrogen, cat# 15596–018),  
424 following manufacturer instruction from pools of five individuals and for different  
425 developmental stages and tissues (embryos, all five instar stages, female whole body,  
426 male testis, male gut, male fat body and male carcass). cDNA was synthesized using  
427 High-Capacity cDNA Reverse Transcription Kit (Life Technologies, cat# 4368814). *Kl-*  
428 *3* expression was evaluated by qRT-PCR using the specific primers (Ti\_kl3\_qF1 5'-  
429 ACCTACCCAGCTAATTTTCAC-3' and Ti\_kl3\_qR1 5'-  
430 GACATTCCTCGCCTTTAATTGAC-3') using the *T. infestans* actin gene 18S as  
431 control (Ti\_18S\_F 5'-TTGGGGCTTGCAATTGTTCC-3' and Ti\_18S\_R 5'-  
432 TACAAAGGGCAGGGACGTAATC-3'). Rapid Amplification of cDNA ends  
433 (Invitrogen, cat# 18373–019 and 18374–058) and RT-PCR (Invitrogen, cat# 12574–  
434 035) were performed for gene annotation and nucleotide sequencing correction. All  
435 PCR products were Sanger sequenced at Macrogen (Korea).

## 436 **Functional analysis through knockdown experiments**

437 Functional analysis was carried out using gene silencing (knockdown) by interference  
438 RNA (RNAi) using standard methods patronized by our group<sup>27,32</sup>. Basically, double  
439 stranded RNA for *kl-3* (dsKL3) and the control gene keratine (dsKER)<sup>27</sup> were  
440 synthesized using the MegaScript High Yield Transcription Kit (Ambion - USA)  
441 according to the manufacturer's instructions (primers Ti\_kl3\_t7F1 5'-  
442 TAATACGACTCACTATAGGGGTTTTGTCTCCTGGAATTATTG-3' and Ti\_kl3\_t7R1  
443 5'-TAATACGACTCACTATAGGGACATCACCTGTAAGAAATAC-3'; product size  
444 533bp). After suspension of dsRNA (1µg/ul) in sterile saline solution, 300ng of each  
445 dsRNA was inoculated in 5<sup>th</sup> instar males for the respective treatment groups. Each  
446 experimental group (dsKL3 and dsKER) was composed of ten insects that were fed  
447 weekly in mice (hairless) after dsRNA injection. Molting and death were also observed  
448 weekly. Emerging adults were then transferred to flasks containing a virgin adult  
449 female. Couples were feed weekly on mice (hairless) and egg laying was annotated for  
450 five weeks after couple formation. Egg hatching was accounted for two extra weeks.

451 Males were dissected on the fifth week post couple formation to measure RNA  
452 expression levels (qRT-PCR), while females were dissected to confirm insemination.  
453 Female spermatheca was dissected in sterile saline solution (pH 7.0) and transferred to a  
454 microscope slide with 5µl of sterile PBS (pH 6.8). Spermatheca were then sheared with  
455 the use of sterile needles and then a micro slide laid upon the mixture. A final pressure  
456 in the microslide with the tip of a pen was applied to spread the material. Each slide was  
457 visualized in optical microscopes (400x magnification) for up to 30 minutes or until  
458 resection.

#### 459 **Evolutionary tests and statistical analysis**

460 Dynein amino acid sequences sequences from other organisms were obtained at NCBI  
461 and aligned with Muscle<sup>35</sup>. Evolutionary analyses were conducted in MEGA7<sup>36</sup>. The  
462 evolutionary history was inferred using the Neighbor-Joining method (10.000  
463 replicates; pairwise deletion)<sup>37</sup>. The evolutionary distances were computed using the  
464 Poisson correction method and are in the units of the number of amino acid  
465 substitutions per site. All accession numbers are shown in the respective figures.  
466 Statistical analysis was performed in GraphPad Prism 8.1.2 software (GraphPad  
467 Software Inc.)

468

469
